# Supplementary material for: Design and performance of a multi-centre randomised controlled trial and economic evaluation of joint tele-consultations [ISRCTN54264250]
Source: Springer Nature journal article supplement (doi:10.1186/1471-2296-3-1), 2002-01-11
Supplement: Additional file 1 [file 1471-2296-3-1-s1.doc]

***Appendix 1:***

***Participating clinicians, nursing, administrative and management staff* : *London***

### Hospital

### Specialists

Mr Mahmoud Al-Akraa

Dr Pierre Bouloux

Mr Tim Briggs

Dr Owen Epstein

Mr Nick Garlick

Mr Nick Goddard

Dr Inam Haq

Mr Amir Kaisary

Mr Robert Morgan

Mr Robert Quiney

Mr Mike Stearns

Dr Roger Wolman

### Hospital Secretaries

Ms Alison Bell

Ms Marva Brown

Ms Colette Durcan

Ms Liz Scott

Ms Lisa Thane

Ms Sylvie Vingoe

Ms Norma White

### Hospital Nurses

Ms Margaret Cummings

Ms Anna-Maria Kennedy

Ms Nina Shaw

Mr Nick Simmonds

Ms Geetha Somrah

### Hospital Receptionists

Ms Ann Goodall

Ms Mary Herman

Ms Coretta Hyatt

Ms Beth Jacobs

Ms Phyl Odd

### Other Hospital Staff

Mr Steve Ashmore

Ms Jill Brook

Ms Jacki Edwards

Peter Goulton

Ms Bernadette Lobo

Ms Angela Mcguire

Ms Rachel Ryan

Ms Sonia Summerbell

### General Practitioners

Dr Miranda Abraham

Dr Rajnikant Acharya

Dr N Andrawis

Dr Eric Ansell

Dr A Antoniou

Dr Nicky Beck

Dr Annette Bendor

Dr John Bentley

Dr Paul Blom

Dr Hoda Botros

Dr Surendar Brar

Dr Helen Bygrave

Dr Claire Chalmers-Watson

Dr Harry Chester

Dr Caroline Crockard

Dr Sarah Davey

Dr Cristina Davis

Dr Charles Edmondson

Dr Martin Foley

Dr Samantha Foster

Dr Karen Fraser

Dr Barbara Frosh

Dr Brian Golden

Dr Andrew Goodstone

Dr Nicholas Graham

Dr Stephen Graham

Dr Tina Grimble

Dr Lucia Grun

Dr Helen Halpern

Dr Clare Halsted

Dr Jane Higgins

Dr Simon Hodes

Dr Kathy Hoffman

Dr John Horton

Dr Alexis Ingram

Dr Lesley Isenberg

Dr Rhian Jones

Dr T Kelly

Dr Eunice Laleye

Dr Jane Lim

Dr Julia Lim

Dr Doris Lister

Dr Vivienne Manheim

Dr Claire Manktelow

Dr Margaret McCollum

Dr Kokila Mehta

Dr Richard Mendall

Dr Sarah Morgan

Dr Irwin Nazareth

Dr Helen Parkes

Dr Sarah Robins

Dr Peter Rudge

Dr Mahesh Saini

Dr Jeremy Sandford

Dr Hilary Shaw

Dr Jonathan Sheldon

Dr Joe Slesenger

Dr Charlotte Smailes

Dr Liam Smeeth

Dr Sarah Smith

Dr Teresa Smith

Dr Peter Soutter

Dr Robert Speight

Dr Thomas Strommer

Dr Andrew Stuart

Dr Barry Subel

Dr David Thompson

Dr D Twena

Dr Tony Uzoka

Dr Paul Wallace

Dr Adrian N Wayne

Dr Mary Windle

Dr Paul Wiseman

Dr Stuart Wolfman

General Practice Staff

Ms Maureen Aldridge

Ms Pauline Atkinson

Mr Michael Cahalan

Ms Theresa Callum

Mrs Beverly Clark

Ms Joan Costello

Ms Jane Davis

Ms Pauline Dudman

Ms Gail Green

Ms Tracey Grossman

Ms Chris Hayward

Mr Nick Hooker

Ms Yvonne Less

Mr Mike Mair

Ms Maura McAssery

Mr Michael Morton

Ms Cindy O’Garo

Ms Ethel Orr

Mr John Orr

Ms Jill Stephens

Ms Virginia Woods

***Participating clinicians, nursing, administrative and management staff : Shrewsbury***

### Hospital

### Specialists

Mr Andrew Hay,

Dr David Maxton,

Mr Bill Neil, Consultant

Dr Simon Nightingale,

Dr Warren Perks,

Mr Andrew Prichard,

Dr Mark Smith,

Dr Bob Wilson

Royal Shrewsbury

& Community

Hospitals

Medical Secretaries

Appointments and Medical Records staff

Members of the IT Group

Royal Shrewsbury

Hospital

Outpatient Department

Nursing staff

### General Practitioners

by Practice

## Bishops Castle:

Dr John Campbell

Dr Adrian Fairbanks

Dr Nick Howell

Dr Adrian Penny

Dr Clare Stanford

## Caxton Surgery, Oswestry:

Dr Michael Arthur

Dr David Campbell

Dr Alastair Mackereth

Dr Paul Middleton

Dr Hilary Rees

## Church Stretton:

Dr Jonathan Beach

Dr Jenny Howard

Dr Steve Novick

Dr Timothy Parker

Dr Karen Robinson

Dr Rachel Taylor

Dr Charles West

Dr Deborah West

## Clive:

Dr John Ballantyne

Dr Julia Bennett

Dr Geoff Davies

## Craven Arms:

Dr David Appleby

Dr Philippa Winter

## Knighton:

Dr Kevin Howcroft

Dr Sue Lambert

## Llanfair Caereinion:

Dr Anthony Evans

Dr Alun Jones-Evans

Dr Lesley Milne

Dr Gillian O’Dwyer

Dr Patrick O’Dwyer

## Llanfyllin:

Dr Huw Evans

Dr Richard Griffiths

Dr Marcia Hancorn

Dr Peter Jones

Dr Melanie Plant

Dr Adrian Weston

## Montgomery:

Dr Simon Currin

Dr Donna Griffiths

Dr Patricia Lindsay

Dr Ainsley Reid

Dr Ann Welton

Dr John Wynn-Jones

## Newtown:

Dr Richard Evans

Dr Steve James

Dr Margaret Jones

Dr Tim McVey

Dr Chris Nevill

Dr Alan Porter

Dr Michael Wilson

## Pontesbury:

Dr Steve Edmunds

Dr Helen Hawkridge

Dr Julian Povey

## Ty Maen, Oswestry:

Dr Wendy Dyke

Dr David Loveday

Dr Ray McMurray

Dr Anthony Treasure

Dr Helen Willows

## Willow Street, Oswestry:

Dr Tim Breese

Dr Anthony St John Taylor

## Worthen:

Dr Tim Watson

# Practice Managers

# and other practice

# administrative

# support staff
